# Supplementary material
Source: Springer Nature journal article supplement (https://www.springermedizin.de/resource/supplementary/13048_2012_97_MOESM7_ESM.pdf/9664888)

A.

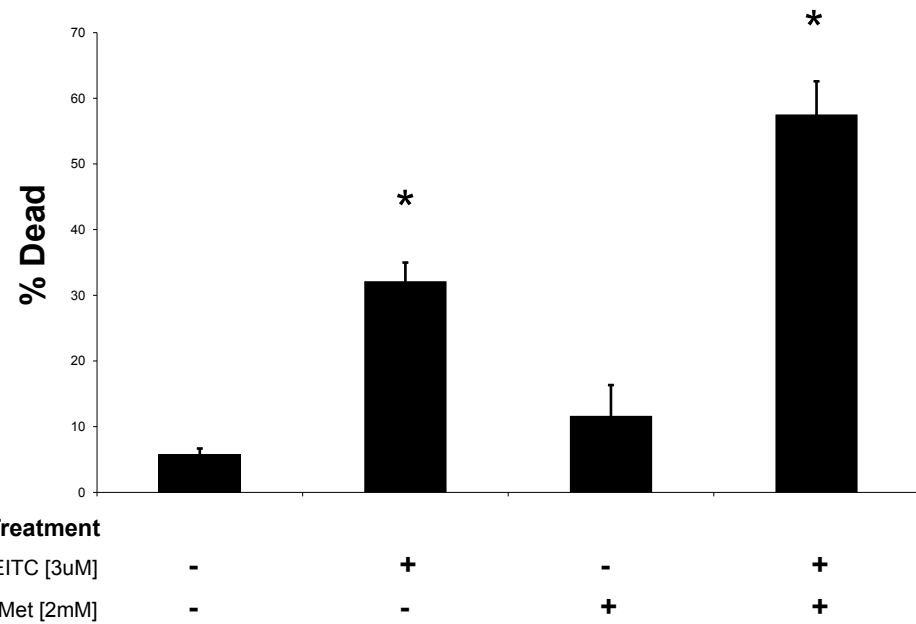

B.

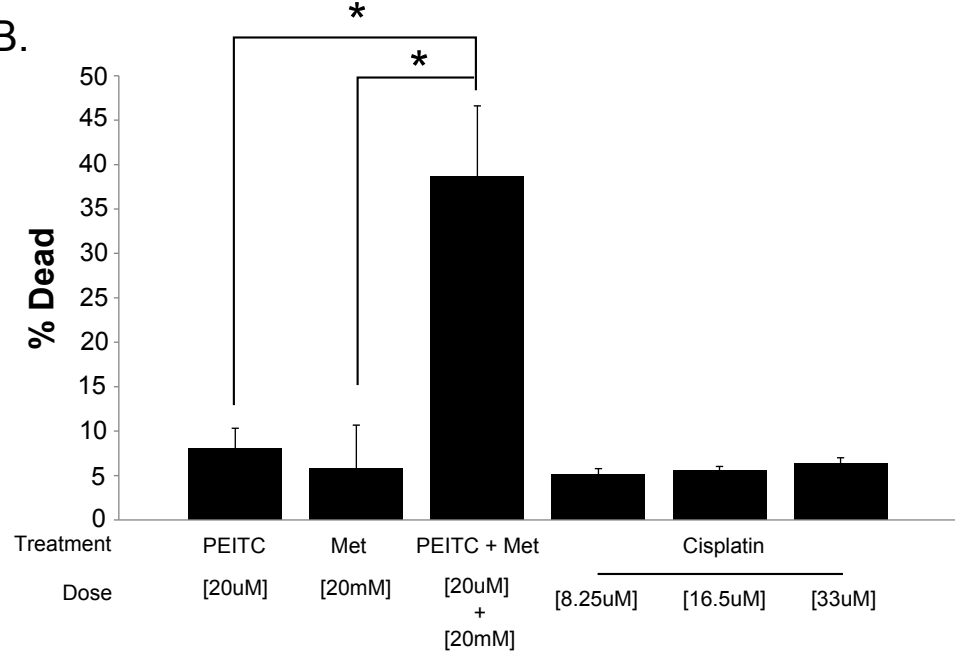

C.

A2780cis  
CI Values at:

| ED50    | ED75     | ED90     |
|---------|----------|----------|
| 0.00015 | 7.62e-06 | 3.90e-07 |

Supplement: MOESM7 [file 9664888]
